# Supplementary material for: Cold atmospheric plasma as antiviral therapy – effect on human herpes simplex virus type 1
Source: PubMed Central journal article supplement (PMC7414428; doi:10.1099/jgv.0.001382), 2020-01-21
Supplement: jgv-101-208-s001.pdf [file jgv-101-208-s001.pdf]

## **Supplementary information**

### **Cold atmospheric plasma as antiviral therapy - effect on human herpes simplex virus type 1**

Oskar Bunz, Kemal Mese, Christina Funk, Maximilian Wulf, Susanne M.

Bailer, Andree Piwowarczyk, Anja Ehrhardt

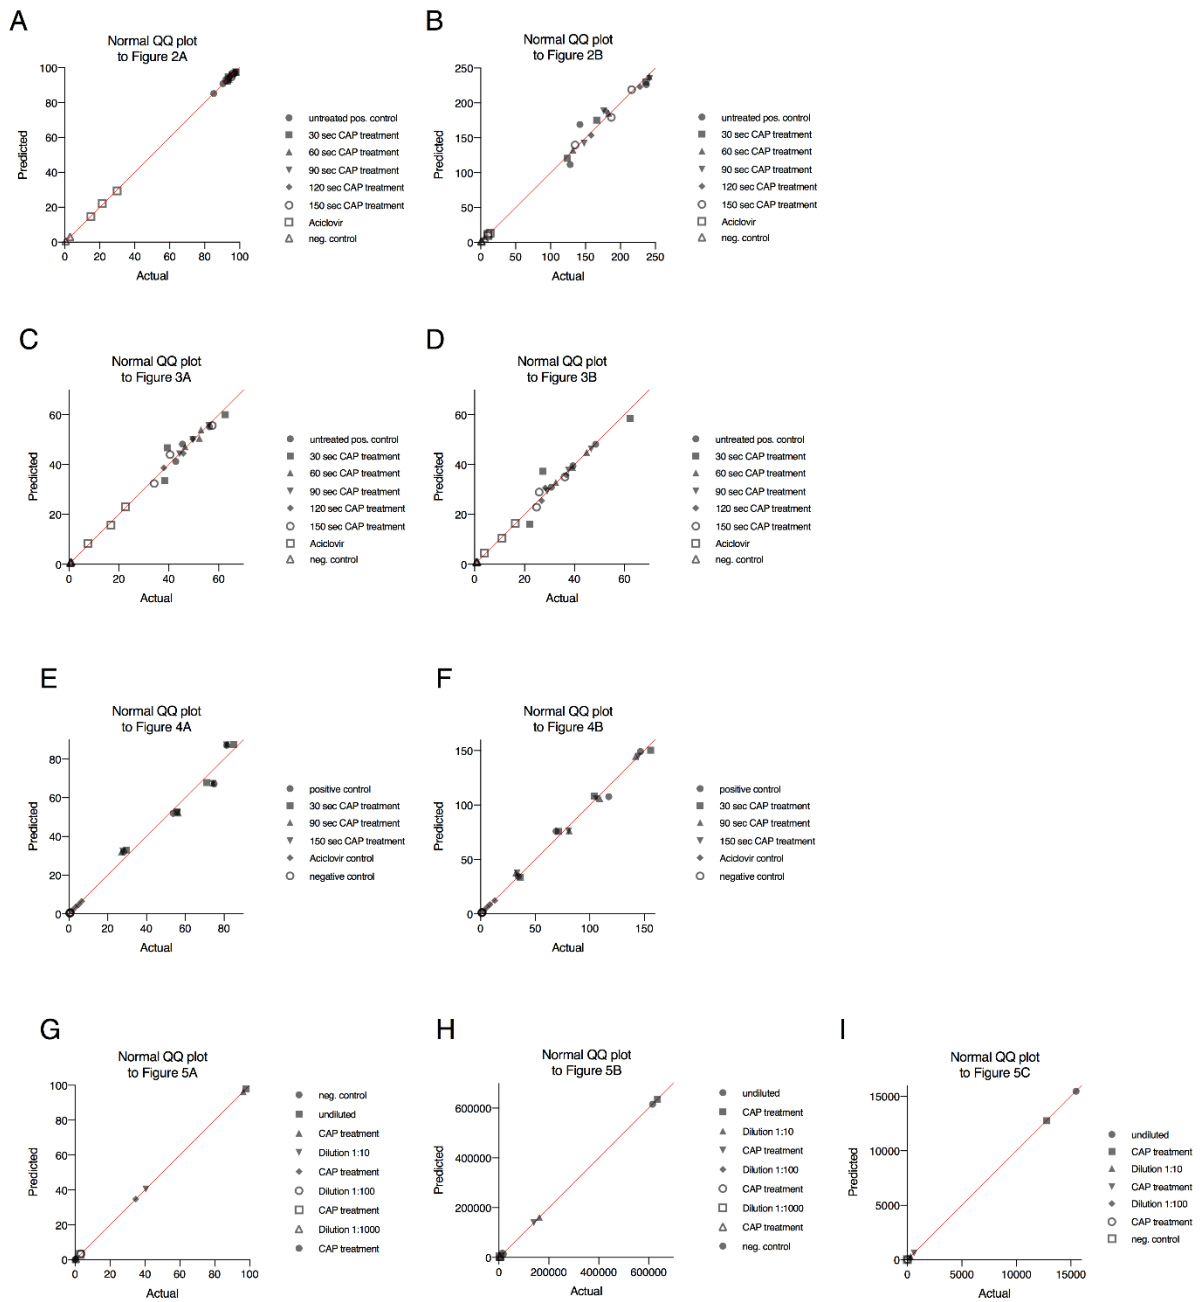

**Supplementary Figure 1. Normal QQ plots of the statistical analysis of figures 2 to 5. (A-I)** The QQ plots show visually that the results are normally distributed. Please note the subfigures refer to the respective main figures as mentioned in the title of the single subfigures.

**A**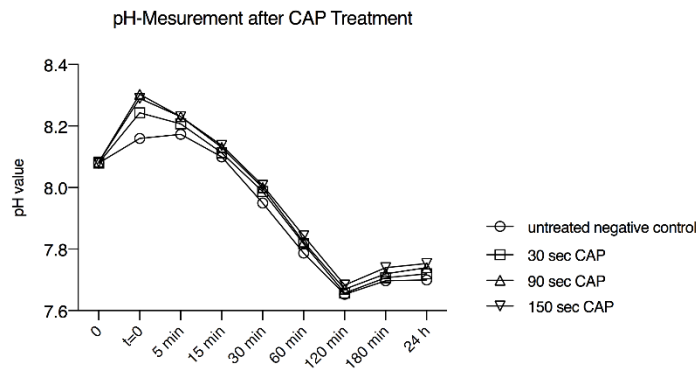**B**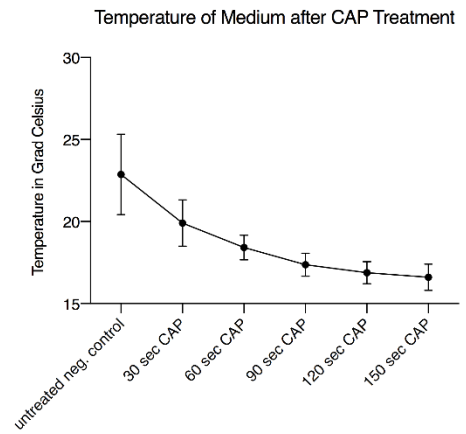

**Supplementary Figure 2. Effects of CAP on temperature and pH-values of the medium. (A)** Effect of different CAP dosages on the temperature of the medium. **(B)** Effect of the different dosages of CAP on the pH values of the medium used for culturing cells.
